# Supplementary material
Source: PubMed Central journal article supplement (PMC3511763)
Supplement: 1212452109_pnas.201212452SI.pdf [file 1212452109_pnas.201212452SI.pdf]

# Supporting Information

Tibayrenc and Ayala 10.1073/pnas.1212452109

**Table S1. Species surveyed and their references**

| Species                               | References                        |
|---------------------------------------|-----------------------------------|
| <b>Bacteria</b>                       |                                   |
| <i>Bacillus</i> sp                    | (1, 2)                            |
| <i>Bacillus anthracis</i>             | (3, 4)                            |
| <i>Bacillus cereus</i>                | (5–7)                             |
| <i>Bacillus subtilis</i>              | (8)                               |
| <i>Bartonella bacilliformis</i>       | (9)                               |
| <i>Bartonella henselae</i>            | (10)                              |
| <i>Bartonella quintana</i>            | (11)                              |
| <i>Borrelia</i> sp                    | (12)                              |
| <i>Burkholderia</i> sp                | (2)                               |
| <i>Burkholderia mallei</i>            | (13)                              |
| <i>Burkholderia oklahomensis</i>      | (13)                              |
| <i>Burkholderia pseudomallei</i>      | (6, 7, 13, 14)                    |
| <i>Burkholderia thailandensis</i>     | (13)                              |
| <i>Campylobacter coli</i>             | (15)                              |
| <i>Campylobacter jejuni</i>           | (7, 15)                           |
| <i>Enterococcus faecalis</i>          | (16, 17)                          |
| <i>Enterococcus faecium</i>           | (7, 16, 17)                       |
| <i>Escherichia coli</i>               | (7, 8, 18–28)                     |
| <i>Francisella tularensis</i>         | (22)                              |
| <i>Haemophilus influenzae</i>         | (7)                               |
| <i>Helicobacter pylori</i>            | (6, 7, 24, 29)                    |
| <i>Legionella pneumophila</i>         | (30–33)                           |
| <i>Listeria</i> sp                    | (34)                              |
| <i>Listeria monocytogenes</i>         | (35)                              |
| <i>Moraxella catarrhalis</i>          | (7)                               |
| <i>Mycobacterium bovis</i>            | (36)                              |
| <i>Mycobacterium tuberculosis</i>     | (3, 36–42)                        |
| <i>Neisseria gonorrhoeae</i>          | (7, 18, 43–45)                    |
| <i>Neisseria lactamica</i>            | (2, 18, 43–45)                    |
| <i>Neisseria meningitidis</i>         | (2, 6, 7, 18, 40, 41, 43–56)      |
| <i>Pseudomonas aeruginosa</i>         | (57–59)                           |
| <i>Pseudomonas syringae</i>           | (60)                              |
| <i>Salmonella enterica</i>            | (61)                              |
| <i>Salmonella enterica</i> ser typhi  | (3, 37, 62)                       |
| <i>Staphylococcus aureus</i>          | (6, 7, 17, 24, 29, 41, 55, 62–64) |
| <i>Staphylococcus epidermidis</i>     | (7, 64)                           |
| <i>Streptococcus agalactiae</i>       | (7, 65)                           |
| <i>Streptococcus mitis</i>            | (66, 67)                          |
| <i>Streptococcus oralis</i>           | (66, 67)                          |
| <i>Streptococcus pneumoniae</i>       | (6, 7, 17, 41, 65–72)             |
| <i>Streptococcus pseudopneumoniae</i> | (66, 67)                          |
| <i>Streptococcus pyogenes</i>         | (6, 7, 17, 22, 65, 73)            |
| <i>Vibrio cholerae</i>                | (74)                              |
| <i>Vibrio parahaemolyticus</i>        | (74)                              |
| <i>Vibrio vulnificus</i>              | (7, 74)                           |
| <i>Xanthomonas campestris</i>         | (75)                              |
| <i>Yersinia pestis</i>                | (3, 18, 37)                       |
| <i>Yersinia pseudotuberculosis</i>    | (76)                              |
| <b>Fungi</b>                          |                                   |
| <i>Aspergillus fumigatus</i>          | (77)                              |
| <i>Candida albicans</i>               | (77–80)                           |
| <i>Candida dubliniensis</i>           | (81)                              |
| <i>Cryptococcus gattii</i>            | (82)                              |
| <i>Cryptococcus neoformans</i>        | (77, 83, 84)                      |
| <i>Fusarium oxysporum</i>             | (85)                              |

Table S1. Cont.

| Species                                | References                |
|----------------------------------------|---------------------------|
| <i>Phytophthora andina</i>             | (86)                      |
| <i>Phytophthora infestans</i>          | (77)                      |
| <i>Pneumocystis</i> sp                 | (87, 88)                  |
| Parasitic protozoa                     |                           |
| <i>Chritidia</i> sp                    | (89)                      |
| <i>Cryptosporidium</i> sp              | (90–92)                   |
| <i>Giardia intestinalis</i>            | (91, 93–100)              |
| <i>Leishmania braziliensis</i>         | (101, 102)                |
| <i>Leishmania donovani</i> (complex)   | (101, 103–110)            |
| <i>Leishmania guyanensis</i>           | (107, 111)                |
| <i>Leishmania major</i>                | (101, 107, 112)           |
| <i>Leishmania mexicana</i>             | (101)                     |
| <i>Leishmania tropica</i>              | (107, 113)                |
| <i>Perkinsus marinus</i>               | (114)                     |
| <i>Plasmodium</i> sp                   | (3, 77, 90, 107, 115–127) |
| <i>Sarcocystis neurona</i>             | (128)                     |
| <i>Toxoplasma gondii</i>               | (77, 90–92, 128–137)      |
| <i>Trypanosoma brucei</i> (sensu lato) | (77, 97, 138)             |
| <i>Trypanosoma brucei gambiense</i>    | (107, 139–142)            |
| <i>Trypanosoma congolense</i>          | (107, 143)                |
| <i>Trypanosoma cruzi</i>               | (77, 97, 107, 144–157)    |
| <i>Trypanosoma evansi</i>              | (107)                     |
| <i>Trypanosoma equiperdum</i>          | (107)                     |
| <i>Trypanosoma vivax</i>               | (107, 158)                |
| DNA viruses                            |                           |
| Adenovirus                             | (159)                     |
| Hepatitis B virus                      | (160, 161)                |
| Maize streak virus                     | (162)                     |
| Poxvirus                               | (163)                     |
| Varicella zoster virus                 | (164)                     |
| RNA viruses                            |                           |
| Chikungunya virus                      | (165)                     |
| Coronavirus                            | (166, 167)                |
| Dengue virus                           | (161, 168–170)            |
| Ebola virus                            | (171)                     |
| Enterovirus echovirus                  | (172)                     |
| Hepatitis C virus                      | (161, 173–175)            |
| Hepatitis E virus                      | (176)                     |
| HIV                                    | (166, 177)                |
| Influenza virus                        | (166, 178)                |
| Picornavirus                           | (179, 180)                |
| Rabies virus                           | (181, 182)                |
| Simian immunodeficiency virus          | (177)                     |
| West Nile virus                        | (183, 184)                |

- Didelot X, Falush D (2007) Inference of bacterial microevolution using multilocus sequence data. *Genetics* 175:1251–1266.
- Vos M (2011) A species concept for bacteria based on adaptive divergence. *Trends Microbiol* 19:1–7.
- Achtman M (2004) Population structure of pathogenic bacteria revisited. *Int J Med Microbiol* 294:67–73.
- Kenecic LJ, Okinaka RT, Keim P (2010) *Bacterial Population Genetics in Infectious Disease*, eds Robinson DA, Falush D, Feil EJ (Wiley–Blackwell, Hoboken, NJ), pp 169–180.
- Didelot X, Barker M, Falush D, Priest FG (2009) Evolution of pathogenicity in the *Bacillus cereus* group. *Syst Appl Microbiol* 32:81–90.
- Hanage WP, Fraser C, Spratt BG (2006) The impact of homologous recombination on the generation of diversity in bacteria. *J Theor Biol* 239:210–219.
- Pérez-Losada M, et al. (2006) Population genetics of microbial pathogens estimated from multilocus sequence typing (MLST) data. *Infect Genet Evol* 6:97–112.
- Wiedenbeck J, Cohan FM (2011) Origins of bacterial diversity through horizontal genetic transfer and adaptation to new ecological niches. *FEMS Microbiol Rev* 35:957–976.
- Chaloner GL, Palmira Ventosilla, Birtles RJ (2011) Multi-locus sequence analysis reveals profound genetic diversity among isolates of the human pathogen *Bartonella bacilliformis*. *PLoS Negl Trop Dis* 5:e1248.
- Mietze A, et al. (2011) Combined MLST and AFLP typing of *Bartonella henselae* isolated from cats reveals new sequence types and suggests clonal evolution. *Vet Microbiol* 148: 238–245.
- Arvand M, Raoult D, Feil EJ (2010) Multi-locus sequence typing of a geographically and temporally diverse sample of the highly clonal human pathogen *Bartonella quintana*. *PLoS ONE* 5:e9765.
- Kurtenbach K, et al. (2010) *Bacterial Population Genetics in Infectious Disease*, eds Robinson DA, Falush D, Feil EJ (Wiley–Blackwell, Hoboken, NJ), pp 217–245.
- Pearson T, et al. (2009) Phylogeographic reconstruction of a bacterial species with high levels of lateral gene transfer. *BMC Biol* 7:78.
- Dale J, et al. (2011) Epidemiological tracking and population assignment of the non-clonal bacterium, *Burkholderia pseudomallei*. *PLoS Negl Trop Dis* 5:e1381.
- Sheppard SK, Maiden MCJ, Falush D (2010) *Bacterial Population Genetics in Infectious Disease*, eds Robinson DA, Falush D, Feil EJ (Wiley–Blackwell, Hoboken, NJ), pp 181–194.
- Willems RJ (2010) *Bacterial Population Genetics in Infectious Disease*, eds Robinson DA, Falush D, Feil EJ (Wiley–Blackwell, Hoboken, NJ), pp 195–216.
- Willems RJJ, Hanage WP, Bessen DE, Feil EJ (2011) Population biology of Gram-positive pathogens: High-risk clones for dissemination of antibiotic resistance. *FEMS Microbiol Rev* 35: 872–900.
- Achtman M, Wagner M (2008) Microbial diversity and the genetic nature of microbial species. *Nat Rev Microbiol* 6:431–440.
- Chaudhuri RR, Henderson IR (2012) The evolution of the *Escherichia coli* phylogeny. *Infect Genet Evol* 12:214–226.

20. Clermont O, et al. (2011) Animal and human pathogenic *Escherichia coli* strains share common genetic backgrounds. *Infect Genet Evol* 11:654–662.
21. Denamur E, Picard B, Tenaillon O (2010) *Bacterial Population Genetics in Infectious Disease*, eds Robinson DA, Falush D, Feil EJ (Wiley–Blackwell, Hoboken, NJ), pp 269–286.
22. Didelot X, Darling A, Falush D (2009) Inferring genomic flux in bacteria. *Genome Res* 19:306–317.
23. Luo C, et al. (2011) Genome sequencing of environmental *Escherichia coli* expands understanding of the ecology and speciation of the model bacterial species. *Proc Natl Acad Sci USA* 108:7200–7205.
24. Narra HP, Ochman H (2006) Of what use is sex to bacteria? *Curr Biol* 16:R705–R710.
25. Tenaillon O, Skurnik D, Picard B, Denamur E (2010) The population genetics of commensal *Escherichia coli*. *Nat Rev Microbiol* 8:207–217.
26. Walk ST, et al. (2009) Cryptic lineages of the genus *Escherichia*. *Appl Environ Microbiol* 75:6534–6544.
27. Wirth T, et al. (2006) Sex and virulence in *Escherichia coli*: An evolutionary perspective. *Mol Microbiol* 60:1136–1151.
28. Woods RJ, et al. (2011) Second-order selection for evolvability in a large *Escherichia coli* population. *Science* 331:1433–1436.
29. Feil EJ (2010) *Bacterial Population Genetics in Infectious Disease*, eds Robinson DA, Falush D, Feil EJ (Wiley–Blackwell, Hoboken, NJ), pp 19–35.
30. Coscollá M, Comas I, González-Candelas F (2011) Quantifying nonvertical inheritance in the evolution of *Legionella pneumophila*. *Mol Biol Evol* 28:985–1001.
31. Edwards MT, Fry NK, Harrison TG (2008) Clonal population structure of *Legionella pneumophila* inferred from allelic profiling. *Microbiology* 154:852–864.
32. Gomez-Valero L, Rusniok C, Buchrieser C (2009) *Legionella pneumophila*: population genetics, phylogeny and genomics. *Infect Genet Evol* 9:727–739.
33. Selander RK, et al. (1985) Genetic structure of populations of *Legionella pneumophila*. *J Bacteriol* 163:1021–1037.
34. den Bakker HC, Bundrant BN, Fortes ED, Orsi RH, Wiedmann M (2010) A population genetics-based and phylogenetic approach to understanding the evolution of virulence in the genus *Listeria*. *Appl Environ Microbiol* 76:6085–6100.
35. den Bakker HC, Didelot X, Fortes ED, Nightingale KK, Wiedmann M (2008) Lineage specific recombination rates and microevolution in *Listeria monocytogenes*. *BMC Evol Biol* 8:277.
36. Smith NH (2012) The global distribution and phylogeography of *Mycobacterium bovis* clonal complexes. *Infect Genet Evol* 12:857–865.
37. Achtman M (2008) Evolution, population structure, and phylogeography of genetically monomorphic bacterial pathogens. *Annu Rev Microbiol* 62:53–70.
38. Bifani PJ, Mathema B, Kurepina NE, Kreiswirth BN (2002) Global dissemination of the *Mycobacterium tuberculosis* W-Beijing family strains. *Trends Microbiol* 10:45–52.
39. Dos Vultros T, et al. (2008) Evolution and diversity of clonal bacteria: The paradigm of *Mycobacterium tuberculosis*. *PLoS ONE* 3:e1538.
40. Falush D (2009) Toward the use of genomics to study microevolutionary change in bacteria. *PLoS Genet* 5:e1000627.
41. Fraser C, Hanage WP, Spratt BG (2005) Neutral microepidemic evolution of bacterial pathogens. *Proc Natl Acad Sci USA* 102:1968–1973.
42. Supply P, et al. (2003) Linkage disequilibrium between minisatellite loci supports clonal evolution of *Mycobacterium tuberculosis* in a high tuberculosis incidence area. *Mol Microbiol* 47:529–538.
43. Bennett JS, et al. (2007) Species status of *Neisseria gonorrhoeae*: Evolutionary and epidemiological inferences from multilocus sequence typing. *BMC Biol* 5:35.
44. Hanage WP, Fraser C, Spratt BG (2005) Fuzzy species among recombinogenic bacteria. *BMC Biol* 3:6.
45. Maiden MCJ (2008) Population genomics: Diversity and virulence in the *Neisseria*. *Curr Opin Microbiol* 11:467–471.
46. Bart A, et al. (2001) The population structure of *Neisseria meningitidis* serogroup A fits the predictions for clonality. *Infect Genet Evol* 1:117–122.
47. Buckee CO, et al. (2008) Role of selection in the emergence of lineages and the evolution of virulence in *Neisseria meningitidis*. *Proc Natl Acad Sci USA* 105:15082–15087.
48. Budroni S, et al. (2011) *Neisseria meningitidis* is structured in clades associated with restriction modification systems that modulate homologous recombination. *Proc Natl Acad Sci USA* 108:4494–4499.
49. Caugant DA (2008) Genetics and evolution of *Neisseria meningitidis*: Importance for the epidemiology of meningococcal disease. *Infect Genet Evol* 8:558–565.
50. Didelot X, Urwin R, Maiden MCJ, Falush D (2009) Genealogical typing of *Neisseria meningitidis*. *Microbiology* 155:3176–3186.
51. Didelot X (2010) *Bacterial Population Genetics in Infectious Disease*, eds Robinson DA, Falush D, Feil EJ (Wiley–Blackwell, Hoboken, NJ), pp 37–60.
52. Caugant DA, Maiden MCJ (2009) Meningococcal carriage and disease—population biology and evolution. *Vaccine* 27(Suppl 2):B64–B70.
53. Joseph B, et al. (2011) Virulence evolution of the human pathogen *Neisseria meningitidis* by recombination in the core and accessory genome. *PLoS ONE* 6:e18441.
54. Maiden MCJ (2006) Multilocus sequence typing of bacteria. *Annu Rev Microbiol* 60:561–588.
55. Turner KME, Feil EJ (2007) The secret life of the multilocus sequence type. *Int J Antimicrob Agents* 29:129–135.
56. Vogel U, Schoen C, Elias J (2010) *Bacterial Population Genetics in Infectious Disease*, eds Robinson DA, Falush D, Feil EJ (Wiley–Blackwell, Hoboken, NJ), pp 247–267.
57. Pirnay JP, et al. (2009) *Pseudomonas aeruginosa* population structure revisited. *PLoS ONE* 4:e7740.
58. van Mansfeld R, et al. (2010) The population genetics of *Pseudomonas aeruginosa* isolates from different patient populations exhibits high-level host specificity. *PLoS ONE* 5:e13482.
59. Wiehlmann L, et al. (2007) Population structure of *Pseudomonas aeruginosa*. *Proc Natl Acad Sci USA* 104:8101–8106.
60. Sarkar SF, Guttman DS (2004) Evolution of the core genome of *Pseudomonas syringae*, a highly clonal, endemic plant pathogen. *Appl Environ Microbiol* 70:1999–2012.
61. Didelot X, et al. (2011) Recombination and population structure in *Salmonella enterica*. *PLoS Genet* 7:e1002191.
62. Baker S, Hanage WP, Holt KE (2010) Navigating the future of bacterial molecular epidemiology. *Curr Opin Microbiol* 13:640–645.
63. Feil EJ, et al. (2003) How clonal is *Staphylococcus aureus*? *J Bacteriol* 185:3307–3316.
64. Smyth DA, Robinson DA (2010) *Bacterial Population Genetics in Infectious Disease*, eds Robinson DA, Falush D, Feil EJ (Wiley–Blackwell, Hoboken, NJ), pp 321–343.
65. Bessen DE (2010) *Bacterial Population Genetics in Infectious Disease*, eds Robinson DA, Falush D, Feil EJ (Wiley–Blackwell, Hoboken, NJ), pp 345–377.
66. Fraser C, Hanage WP, Spratt BG (2007) Recombination and the nature of bacterial speciation. *Science* 315:476–480.
67. Hanage WP, Fraser C, Tang J, Connor TR, Corander J (2009) Hyper-recombination, diversity, and antibiotic resistance in *pneumococcus*. *Science* 324:1454–1457.
68. Croucher NJ, et al. (2011) Rapid pneumococcal evolution in response to clinical interventions. *Science* 331:430–434.
69. Dagerhamn J, et al. (2008) Determination of accessory gene patterns predicts the same relatedness among strains of *Streptococcus pneumoniae* as sequencing of housekeeping genes does and represents a novel approach in molecular epidemiology. *J Clin Microbiol* 46:863–868.
70. Donkor ES, et al. (2011) High levels of recombination among *Streptococcus pneumoniae* isolates from the Gambia. *MBio* 2:e00040–e11.
71. Henriques-Normark B, Blomberg C, Dagerhamn J, Bättig P, Normark S (2008) The rise and fall of bacterial clones: *Streptococcus pneumoniae*. *Nat Rev Microbiol* 6:827–837.
72. Muzzi A, Donati C (2011) Population genetics and evolution of the pan-genome of *Streptococcus pneumoniae*. *Int J Med Microbiol* 301:619–622.
73. Beres SB, et al. (2010) Molecular complexity of successive bacterial epidemics deconvoluted by comparative pathogenomics. *Proc Natl Acad Sci USA* 107:4371–4376.
74. Bisharat N (2010) *Bacterial Population Genetics in Infectious Disease*, eds Robinson DA, Falush D, Feil EJ (Wiley–Blackwell, Hoboken, NJ), pp 379–402.
75. Fargier E, Fischer-Le Saux M, Manceau C (2011) A multilocus sequence analysis of *Xanthomonas campestris* reveals a complex structure within crucifer-attacking pathogens of this species. *Syst Appl Microbiol* 34:156–165.
76. Ch'ng SL, et al. (2011) Population structure and evolution of pathogenicity of *Yersinia pseudotuberculosis*. *Appl Environ Microbiol* 77:768–775.
77. Heitman J (2006) Sexual reproduction and the evolution of microbial pathogens. *Curr Biol* 16:R711–R725.
78. Chávez-Galarza J, Pais C, Sampaio P (2010) Microsatellite typing identifies the major clades of the human pathogen *Candida albicans*. *Infect Genet Evol* 10:697–702.
79. Nébavi F, et al. (2006) Clonal population structure and genetic diversity of *Candida albicans* in AIDS patients from Abidjan (Côte d'Ivoire). *Proc Natl Acad Sci USA* 103:3663–3668.
80. Tavanti A, et al. (2005) Population structure and properties of *Candida albicans*, as determined by multilocus sequence typing. *J Clin Microbiol* 43:5601–5613.
81. Badoc C, et al. (2002) Clonality structure in *Candida dubliniensis*. *FEMS Microbiol Lett* 209:249–254.
82. Campbell LT, et al. (2005) Clonality and recombination in genetically differentiated subgroups of *Cryptococcus gattii*. *Eukaryot Cell* 4:1403–1409.
83. Tibayrenc M, et al. (1991) Are eukaryotic microorganisms clonal or sexual? A population genetics vantage. *Proc Natl Acad Sci USA* 88:5129–5133.
84. Xu J (2006) Microbial ecology in the age of genomics and metagenomics: Concepts, tools, and recent advances. *Mol Ecol* 15:1713–1731.
85. Fourie G, Steenkamp ET, Ploetz RC, Gordon TR, Viljoen A (2011) Current status of the taxonomic position of *Fusarium oxysporum f. sp. specialis cubense* within the *Fusarium oxysporum* complex. *Infect Genet Evol* 11:533–542.
86. Goss EM, et al. (2011) The plant pathogen *Phytophthora andina* emerged via hybridization of an unknown *Phytophthora* species and the Irish potato famine pathogen, *P. infestans*. *PLoS ONE* 6:e24543.
87. Mazars E, et al. (1997) Isoenzyme diversity in *Pneumocystis carinii* from rats, mice, and rabbits. *J Infect Dis* 175:655–660.
88. Aliouat-Denis CM, et al. (2008) *Pneumocystis* species, co-evolution and pathogenic power. *Infect Genet Evol* 8:708–726.
89. Schmid-Hempel R, Salathé R, Tognazzo M, Schmid-Hempel P (2011) Genetic exchange and emergence of novel strains in directly transmitted trypanosomatids. *Infect Genet Evol* 11: 564–571.
90. Beck HP, et al. (2009) Molecular approaches to diversity of populations of apicomplexan parasites. *Int J Parasitol* 39:175–189.
91. Lymbery AJ, Thompson RCA (2012) The molecular epidemiology of parasite infections: Tools and applications. *Mol Biochem Parasitol* 181:102–116.
92. Morrison LJ, et al. (2008) The population structure of the *Cryptosporidium parvum* population in Scotland: A complex picture. *Infect Genet Evol* 8:121–129.
93. Andersson JO (2012) Double peaks reveal rare diplomonad sex. *Trends Parasitol* 28:46–52.
94. Birky CW, Jr. (2010) *Giardia* sex? Yes, but how and how much? *Trends Parasitol* 26:70–74.
95. Cacciò SM, Sprong H (2010) *Giardia duodenalis*: Genetic recombination and its implications for taxonomy and molecular epidemiology. *Exp Parasitol* 124:107–112.

96. Cooper MA, Adam RD, Worobey M, Sterling CR (2007) Population genetics provides evidence for recombination in *Giardia*. *Curr Biol* 17:1984–1988.
97. Detwiler JT, Criscione CD (2010) An infectious topic in reticulate evolution: Introgression and hybridization in animal parasites. *Genes* 1:102–123.
98. Lasek-Nesselquist E, Welch DM, Thompson RCA, Steuart RF, Sogin ML (2009) Genetic exchange within and between assemblages of *Giardia duodenalis*. *J Eukaryot Microbiol* 56:504–518.
99. Lebbad M, et al. (2011) Multilocus genotyping of human *Giardia* isolates suggests limited zoonotic transmission and association between assemblage B and flatulence in children. *PLoS Negl Trop Dis* 5:e1262.
100. Stensvold CR, Lebbad M, Verweij JJ (2011) The impact of genetic diversity in protozoa on molecular diagnostics. *Trends Parasitol* 27:53–58.
101. Rogers MB, et al. (2011) Chromosome and gene copy number variation allow major structural change between species and strains of *Leishmania*. *Genome Res* 21:2129–2142.
102. Rougeron V, et al. (2009) Extreme inbreeding in *Leishmania braziliensis*. *Proc Natl Acad Sci USA* 106:10224–10229.
103. Alam MZ, et al. (2009) Multilocus microsatellite typing (MLMT) reveals genetic homogeneity of *Leishmania donovani* strains in the Indian subcontinent. *Infect Genet Evol* 9:24–31.
104. Downing T, et al. (2011) Whole genome sequencing of multiple *Leishmania donovani* clinical isolates provides insights into population structure and mechanisms of drug resistance. *Genome Res* 21:2143–2156.
105. Downing T, et al. (2012) Genome-wide SNP and microsatellite variation illuminate population-level epidemiology in the *Leishmania donovani* species complex. *Infect Genet Evol* 12:149–159.
106. Gelanew T, et al. (2010) Inference of population structure of *Leishmania donovani* strains isolated from different Ethiopian visceral leishmaniasis endemic areas. *PLoS Negl Trop Dis* 4:e889.
107. Holzmüller P, Herder S, Cuny G, De Meeüs T (2010) From clonal to sexual: A step in *T. congolense* evolution? *Trends Parasitol* 26:56–60.
108. Leblais R, Kuhls K, François O, Schöniag G, Wirth T (2011) Guns, germs and dogs: On the origin of *Leishmania chagasi*. *Infect Genet Evol* 11:1091–1095.
109. Mauricio IL, et al. (2009) Towards multilocus sequence typing of the *Leishmania donovani* complex: Resolving genotypes and haplotypes for five polymorphic metabolic enzymes (ASAT, GPI, NH1, NH2, PGD). *Int J Parasitol* 36:757–769.
110. Rougeron V, et al. (2011) Multifaceted population structure and reproductive strategy in *Leishmania donovani* complex in one Sudanese village. *PLoS Negl Trop Dis* 5:e1448.
111. Rougeron V, et al. (2011) Reproductive strategies and population structure in *Leishmania*: Substantial amount of sex in *Leishmania Viannia guyanensis*. *Mol Ecol* 20:3116–3127.
112. Sterkers Y, Lachaud L, Crobu L, Bastien P, Pagès M (2011) FISH analysis reveals aneuploidy and continual generation of chromosomal mosaicism in *Leishmania major*. *Cell Microbiol* 13:274–283.
113. Schwenkenbecher JM, et al. (2006) Microsatellite analysis reveals genetic structure of *Leishmania tropica*. *Int J Parasitol* 36:237–246.
114. Thompson PC, Rosenthal BM, Hare MP (2011) An evolutionary legacy of sex and clonal reproduction in the protistan oyster parasite *Perkinsus marinus*. *Infect Genet Evol* 11:598–609.
115. Anderson TJ, et al. (2000) Microsatellite markers reveal a spectrum of population structures in the malaria parasite *Plasmodium falciparum*. *Mol Biol Evol* 17:1467–1482.
116. Annan Z, et al. (2007) Population genetic structure of *Plasmodium falciparum* in the two main African vectors, *Anopheles gambiae* and *Anopheles funestus*. *Proc Natl Acad Sci USA* 104:7987–7992.
117. Duval L, et al. (2010) African apes as reservoirs of *Plasmodium falciparum* and the origin and diversification of the *Laverania* subgenus. *Proc Natl Acad Sci USA* 107:10561–10566.
118. Gauthier C, Tibayrenc M (2005) Population structure of malaria parasites: The driving epidemiological forces. *Acta Trop* 94:241–250.
119. Griffing SM, et al. (2011) South American *Plasmodium falciparum* after the malaria eradication era: Clonal population expansion and survival of the fittest hybrids. *PLoS ONE* 6:e23486.
120. Liu W, et al. (2010) Origin of the human malaria parasite *Plasmodium falciparum* in gorillas. *Nature* 467:420–425.
121. Prugnolle F, et al. (2010) African great apes are natural hosts of multiple related malaria species, including *Plasmodium falciparum*. *Proc Natl Acad Sci USA* 107:1458–1463.
122. Prugnolle F, et al. (2011) A fresh look at the origin of *Plasmodium falciparum*, the most malignant malaria agent. *PLoS Pathog* 7:e1001283.
123. Prugnolle F, et al. (2011) African monkeys are infected by *Plasmodium falciparum* nonhuman primate-specific strains. *Proc Natl Acad Sci USA* 108:11948–11953.
124. Rayner JC, Liu W, Peeters M, Sharp PM, Hahn BH (2011) A plethora of *Plasmodium* species in wild apes: A source of human infection? *Trends Parasitol* 27:222–229.
125. Razakandrainibe FG, et al. (2005) “Clonal” population structure of the malaria agent *Plasmodium falciparum* in high-infection regions. *Proc Natl Acad Sci USA* 102:17388–17393.
126. Rich SM, et al. (2009) The origin of malignant malaria. *Proc Natl Acad Sci USA* 106:14902–14907.
127. Valkiūnas G, Ashford RW, Bensch S, Killick-Kendrick R, Perkins S (2011) A cautionary note concerning *Plasmodium* in apes. *Trends Parasitol* 27:231–232.
128. Wendte JM, et al. (2010) Self-mating in the definitive host potentiates clonal outbreaks of the apicomplexan parasites *Sarcocystis neurona* and *Toxoplasma gondii*. *PLoS Genet* 6:e1001261.
129. Boothroyd JC (2009) *Toxoplasma gondii*: 25 years and 25 major advances for the field. *Int J Parasitol* 39:935–946.
130. Grigg ME, Sundar N (2009) Sexual recombination punctuated by outbreaks and clonal expansions predicts *Toxoplasma gondii* population genetics. *Int J Parasitol* 39:925–933.
131. Khan A, et al. (2011) Genetic analyses of atypical *Toxoplasma gondii* strains reveal a fourth clonal lineage in North America. *Int J Parasitol* 41:645–655.
132. Lehmann T, et al. (2004) Variation in the structure of *Toxoplasma gondii* and the roles of selfing, drift, and epistatic selection in maintaining linkage disequilibria. *Infect Genet Evol* 4:107–114.
133. Lehmann T, Marcet PL, Graham DH, Dahl ER, Dubey JP (2006) Globalization and the population structure of *Toxoplasma gondii*. *Proc Natl Acad Sci USA* 103:11423–11428.
134. Sibley LD, Ajioka JW (2008) Population structure of *Toxoplasma gondii*: Clonal expansion driven by infrequent recombination and selective sweeps. *Annu Rev Microbiol* 62:329–351.
135. Smith JE (2009) Tracking transmission of the zoonosis *Toxoplasma gondii*. *Adv Parasitol* 68:139–159.
136. Su C, Shwab EK, Zhou P, Zhu XQ, Dubey JP (2010) Moving towards an integrated approach to molecular detection and identification of *Toxoplasma gondii*. *Parasitology* 137:1–11.
137. Wendte JM, Gibson AK, Grigg ME (2011) Population genetics of *Toxoplasma gondii*: New perspectives from parasite genotypes in wildlife. *Vet Parasitol* 182:96–111.
138. Balmer O, Beadell JS, Gibson W, Caccone A (2011) Phylogeography and taxonomy of *Trypanosoma brucei*. *PLoS Negl Trop Dis* 5:e961.
139. Koffi M, et al. (2009) Population genetics of *Trypanosoma brucei gambiense*, the agent of sleeping sickness in Western Africa. *Proc Natl Acad Sci USA* 106:209–214.
140. Mathieu-Daude F, Bicart-See A, Bosseno MF, Brenière SF, Tibayrenc M (1994) Identification of *Trypanosoma brucei gambiense* group I by a specific kinetoplast DNA probe. *Am J Trop Med Hyg* 50:13–19.
141. Morrison LJ, et al. (2008) *Trypanosoma brucei gambiense* Type 1 populations from human patients are clonal and display geographical genetic differentiation. *Infect Genet Evol* 8:847–854.
142. Simo G, et al. (2010) Population genetic structure of Central African *Trypanosoma brucei gambiense* isolates using microsatellite DNA markers. *Infect Genet Evol* 10:68–76.
143. Morrison LJ, et al. (2009) Discovery of mating in the major African livestock pathogen *Trypanosoma congolense*. *PLoS ONE* 4:e5564.
144. Tibayrenc M, Ward P, Moya A, Ayala FJ (1986) Natural populations of *Trypanosoma cruzi*, the agent of Chagas disease, have a complex multiclonal structure. *Proc Natl Acad Sci USA* 83:115–119.
145. Flores-López CA, Machado CA (2011) Analyses of 32 loci clarify phylogenetic relationships among *Trypanosoma cruzi* lineages and support a single hybridization prior to human contact. *PLoS Negl Trop Dis* 5:e1272.
146. Gaunt MW, et al. (2003) Mechanism of genetic exchange in American trypanosomes. *Nature* 421:936–939.
147. Lewis MD, et al. (2009) Flow cytometric analysis and microsatellite genotyping reveal extensive DNA content variation in *Trypanosoma cruzi* populations and expose contrasts between natural and experimental hybrids. *Int J Parasitol* 39:1305–1317.
148. Lewis MD, et al. (2011) Recent, independent and anthropogenic origins of *Trypanosoma cruzi* hybrids. *PLoS Negl Trop Dis* 5:e1363.
149. Llewellyn MS, et al. (2009) *Trypanosoma cruzi* IIc: Phylogenetic and phylogeographic insights from sequence and microsatellite analysis and potential impact on emergent Chagas disease. *PLoS Negl Trop Dis* 3:e510.
150. Llewellyn MS, et al. (2009) Genome-scale multilocus microsatellite typing of *Trypanosoma cruzi* discrete typing unit I reveals phylogeographic structure and specific genotypes linked to human infection. *PLoS Pathog* 5:e1000410.
151. Llewellyn MS, et al. (2011) Extraordinary *Trypanosoma cruzi* diversity within single mammalian reservoir hosts implies a mechanism of diversifying selection. *Int J Parasitol* 41:609–614.
152. Miles MA, et al. (2009) The molecular epidemiology and phylogeography of *Trypanosoma cruzi* and parallel research on *Leishmania*: Looking back and to the future. *Parasitology* 136:1509–1528.
153. Ocaña-Mayorga S, Llewellyn MS, Costales JA, Miles MA, Grijalva MJ (2010) Sex, subdivision, and domestic dispersal of *Trypanosoma cruzi* lineage I in southern Ecuador. *PLoS Negl Trop Dis* 4:e915.
154. Tibayrenc M, Ayala FJ (1988) Isozyme variability of *Trypanosoma cruzi*, the agent of Chagas’ disease: Genetical, taxonomical and epidemiological significance. *Evolution* 42:277–292.
155. Tibayrenc M, et al. (1993) Genetic characterization of six parasitic protozoa: Parity between random-primer DNA typing and multilocus enzyme electrophoresis. *Proc Natl Acad Sci USA* 90:1335–1339.
156. Yeo M, et al. (2011) Multilocus sequence typing (MLST) for lineage assignment and high resolution diversity studies in *Trypanosoma cruzi*. *PLoS Negl Trop Dis* 5:e1049.
157. Zingales B, et al. (2012) The revised *Trypanosoma cruzi* subspecific nomenclature: Rationale, epidemiological relevance and research applications. *Infect Genet Evol* 12:240–253.
158. Duffy CW, et al. (2009) *Trypanosoma vivax* displays a clonal population structure. *Int J Parasitol* 39:1475–1483.

159. Robinson CM, Seto D, Jones MS, Dyer DW, Chodosh J (2011) Molecular evolution of human species D adenoviruses. *Infect Genet Evol* 11:1208–1217.
160. Araujo NM, Waizbort R, Kay A (2011) Hepatitis B virus infection from an evolutionary point of view: How viral, host, and environmental factors shape genotypes and subgenotypes. *Infect Genet Evol* 11:1199–1207.
161. Holmes EC (2008) Evolutionary history and phylogeography of human viruses. *Annu Rev Microbiol* 62:307–328.
162. Martin DP, van der Walt E, Posada D, Rybicki EP (2005) The evolutionary value of recombination is constrained by genome modularity. *PLoS Genet* 1:e51.
163. Hughes AL, Irausquin S, Friedman R (2010) The evolutionary biology of poxviruses. *Infect Genet Evol* 10:50–59.
164. Schmidt-Chanasit J, Sauerbrei A (2011) Evolution and world-wide distribution of varicella-zoster virus clades. *Infect Genet Evol* 11:1–10.
165. Cui J, Gao M, Ren X (2011) Phylogeny and homologous recombination in Chikungunya viruses. *Infect Genet Evol* 11:1957–1963.
166. Lam TT, Hon CC, Tang JW (2010) Use of phylogenetics in the molecular epidemiology and evolutionary studies of viral infections. *Crit Rev Clin Lab Sci* 47:5–49.
167. Yip CW, et al. (2009) Phylogenetic perspectives on the epidemiology and origins of SARS and SARS-like coronaviruses. *Infect Genet Evol* 9:1185–1196.
168. Holmes EC (2009) The evolutionary genetics of emerging viruses. *Annu Rev Ecol Syst* 40:353–372.
169. Raghvani J, et al. (2011) Endemic dengue associated with the co-circulation of multiple viral lineages and localized density-dependent transmission. *PLoS Pathog* 7:e1002064.
170. Weaver SC, Vasilakis N (2009) Molecular evolution of dengue viruses: Contributions of phylogenetics to understanding the history and epidemiology of the preeminent arboviral disease. *Infect Genet Evol* 9:523–540.
171. Wittmann TJ, et al. (2007) Isolates of Zaire ebolavirus from wild apes reveal genetic lineage and recombinants. *Proc Natl Acad Sci USA* 104:17123–17127.
172. McWilliam Leitch EC, et al. (2010) Evolutionary dynamics and temporal/geographical correlates of recombination in the human enterovirus echovirus types 9, 11, and 30. *J Virol* 84:9292–9300.
173. Fishman SL, Branch AD (2009) The quasispecies nature and biological implications of the hepatitis C virus. *Infect Genet Evol* 9:1158–1167.
174. Morel V, et al. (2011) Genetic recombination of the hepatitis C virus: Clinical implications. *J Viral Hepat* 18:77–83.
175. Simmonds P, et al. (2005) Consensus proposals for a unified system of nomenclature of hepatitis C virus genotypes. *Hepatology* 42:962–973.
176. Purdy MA, Khudyakov YE (2011) The molecular epidemiology of hepatitis E virus infection. *Virus Res* 161:31–39.
177. Etienne L, Delaporte E, Peeters M (2011) *Genetics and Evolution of Infectious Diseases*, ed Tibayrenc M (Elsevier Insights, Amsterdam), pp 689–710.
178. McHardy AC, Adams B (2009) The role of genomics in tracking the evolution of influenza A virus. *PLoS Pathog* 5:e1000566.
179. Lukashev AN (2010) Recombination among picornaviruses. *Rev Med Virol* 20:327–337.
180. Savolainen-Kopra C, Blomqvist S (2010) Mechanisms of genetic variation in polioviruses. *Rev Med Virol* 20:358–371.
181. Hayman DTS, et al. (2011) Evolutionary history of rabies in Ghana. *PLoS Negl Trop Dis* 5:e1001.
182. Liu W, Liu Y, Liu J, Zhai J, Xie Y (2011) Evidence for inter- and intra-clade recombinations in rabies virus. *Infect Genet Evol* 11:1906–1912.
183. Pesko KN, Ebel GD (2012) West Nile virus population genetics and evolution. *Infect Genet Evol* 12:181–190.
184. Zehender G, et al. (2011) Phylogeography and epidemiological history of West Nile virus genotype 1a in Europe and the Mediterranean basin. *Infect Genet Evol* 11:646–653.
